# Supplementary material for: A novel extraction method for three ochratoxins in human urine based on polystyrene/polyethersulfone electrospun nanofibers coated with copper nanoparticles
Source: Royal Society of Chemistry journal article supplement (doi:10.1039/d4ra04670f), 2024-01-01
Supplement: d4ra04670f1.pdf [file d4ra04670f1.pdf]

*Supplementary Information*

*for*

**A novel extraction method for three ochratoxins in human urine  
based on Polystyrene/polyethersulfone electrospun nanofibers coated  
with copper nanoparticles**

Lanling Chu <sup>a</sup>, Yuqi Dai <sup>a</sup>, Chen Hou <sup>a</sup>, Xuejun Kang <sup>c</sup>, Qianqian Jiang <sup>b\*</sup>, Xiaoman  
Jiang <sup>b\*</sup>, Jing Li <sup>b</sup>, Hongyu Qin <sup>b</sup>

<sup>a</sup> College of Light Industry and Food Engineering, Nanjing Forestry University,  
Nanjing 210037, China

<sup>b</sup> Yantai Key Laboratory of Special Medical Food (Preparatory), School of Food and  
Biological Engineering, Yantai Institute of Technology, Yantai 264005, Shandong,  
China

<sup>c</sup> School of Biological Science & Medical Engineering, Southeast University, Nanjing  
210096, China

\*Corresponding authors at: School of Food and Biological Engineering, Yantai  
Institute of Technology, Yantai 264005, Shandong, China

E-mail address: [jxmldu@163.com](mailto:jxmldu@163.com); [jiangqianqian@yitsd.edu.cn](mailto:jiangqianqian@yitsd.edu.cn)

## 1 **Part 1**

### 2 Preparation of artificial urine:

3        Dissolve the following substances separately in 200mL of deionized water: urine  
4 (2.427 g), uric acid (0.034 g), creatinine (0.090 g), trisodium citrate (0.297 g), sodium  
5 chloride (0.634 g), potassium chloride (0.45 g), ammonium chloride (0.161 g), calcium  
6 chloride dihydrate (0.089 g), magnesium sulfate heptahydrate (0.1 g), sodium  
7 bicarbonate (0.034 g),  $\text{NaC}_2\text{O}_4$  (0.003 g), sodium sulfate (0.258 g), sodium dihydrogen  
8 phosphate monohydrate (0.1 g), and sodium dihydrogen phosphate (0.011 g) were  
9 added to 200 mL deionized water. The mixture was sonicated until completely  
10 dissolved and store at 4 °C for later use.

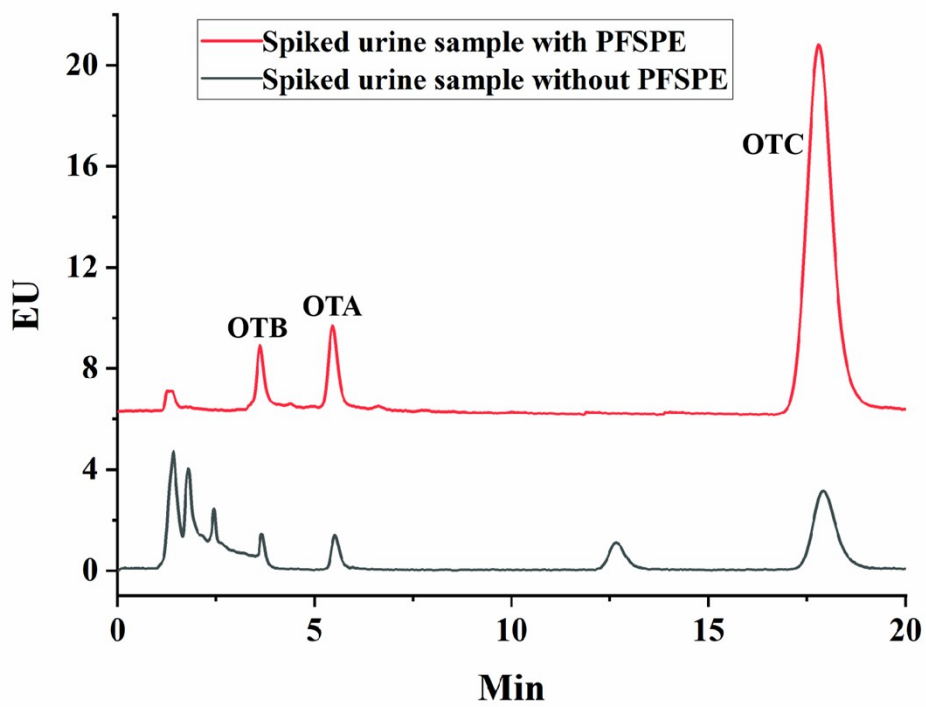

11

12 **Fig. S1.** Chromatogram of three ochratoxins in spiked urine sample with FPSPE (A)

13 and without PFSPE (B)

14 **Table S1.** Comparison of the proposed method with reported methods in literature.

| <b>Matrix</b> | <b>Method</b> | <b>Analyte</b>    | <b>Recovery (%)</b>      | <b>Adsorbents</b>                 | <b>Volume of organic reagents (mL)</b> | <b>LODs (ng/mL)</b> | <b>Ref.</b> |
|---------------|---------------|-------------------|--------------------------|-----------------------------------|----------------------------------------|---------------------|-------------|
| Rice, wine    | UPLC - MS/MS  | OTA               | 82 - 109                 | C18                               | 28                                     | 0.27                | [1]         |
| Chicken liver | HPLC - FLD    | OTA               | 86.4 - 102.9             | Graphene oxide                    | 2.1                                    | 0.20                | [2]         |
| Grains        | HPLC - FLD    | OTA               | 78.9 - 106.4             | GMA-NH <sub>2</sub> -MIL-53@SMIPs | 10.0                                   | 0.4                 | [3]         |
| Urine         | HPLC - FLD    | OTA<br>OTB<br>OTC | 71.3% -<br>92.0%<br>(AR) | PS/PES-<br>CuNPs<br>nanofiber     | 0.7                                    | 0.108 -<br>0.162    | This work   |

**Table. S2.** Determination of three ochratoxins in actual urine samples.

| Sample | Detection level of analytes<br>(ng/mL) |     |      | Sample   | Detection level of analytes<br>(ng/mL) |     |      |
|--------|----------------------------------------|-----|------|----------|----------------------------------------|-----|------|
|        | OTA                                    | OTB | OTC  |          | OTA                                    | OTB | OTC  |
| male1  | ND                                     | ND  | ND   | female1  | ND                                     | ND  | ND   |
| male2  | ND                                     | ND  | 0.31 | female2  | ND                                     | ND  | ND   |
| male3  | ND                                     | ND  | ND   | female3  | ND                                     | ND  | ND   |
| male4  | ND                                     | ND  | ND   | female4  | ND                                     | ND  | ND   |
| male5  | 0.96                                   | ND  | ND   | female5  | ND                                     | ND  | ND   |
| male6  | ND                                     | ND  | ND   | female6  | ND                                     | ND  | ND   |
| male7  | ND                                     | ND  | ND   | female7  | ND                                     | ND  | 0.48 |
| male8  | ND                                     | ND  | ND   | female8  | ND                                     | ND  | ND   |
| male9  | 1.64                                   | ND  | ND   | female9  | ND                                     | ND  | ND   |
| male10 | ND                                     | ND  | ND   | female10 | ND                                     | ND  | ND   |
| male11 | ND                                     | ND  | ND   | female11 | ND                                     | ND  | ND   |
| male12 | ND                                     | ND  | ND   | female12 | ND                                     | ND  | 0.33 |
| male13 | ND                                     | ND  | ND   | female13 | ND                                     | ND  | ND   |
| male14 | ND                                     | ND  | ND   | female14 | ND                                     | ND  | ND   |
| male15 | 0.52                                   | ND  | ND   | female15 | ND                                     | ND  | ND   |

17 ND: no detection

## 18 Reference

- 19 [1] Y. J. Hou, N. Long, Q. B. Xu, Y. Li, P. Y. Song, M. H. Yang, J. Wang, L. D. Zhou,  
20 P. Sheng, W. J. Kong, Development of a Nafion-MWCNTs and in-situ generated Au  
21 nanopopcorns dual-amplification electrochemical aptasensor for ultrasensitive  
22 detection of OTA, *Food. Chem.*, 2023, **403**, 134375.
- 23 [2] Y. Cui, H. Ma, D. Liu, M. Li, R. Hao, J. Li, Y. Jiang, Graphene Oxide Adsorbent-  
24 Based Dispersive Solid Phase Extraction Coupled with Multi-pretreatment Clean-up  
25 for Analysis of Trace Ochratoxin A in Chicken Liver, *Chromatographia*, 2020, **83**(10),  
26 1307-1314.
- 27 [3] X. Zhang, J. He, H. G. Wang, P. F. Xu, M. Y. Wang, Surface Molecularly Imprinted  
28 Polymers Based on NH<sub>2</sub>-MIL-53 for Selective Extraction Ochratoxin A in Real  
29 Sample, *Macrom. Res.*, 2022, **30**, 719-730.
